# Supplementary material
Source: PubMed Central journal article supplement (PMC5484588)
Supplement: NIHMS868754-supplement-1.pdf [file NIHMS868754-supplement-1.pdf]

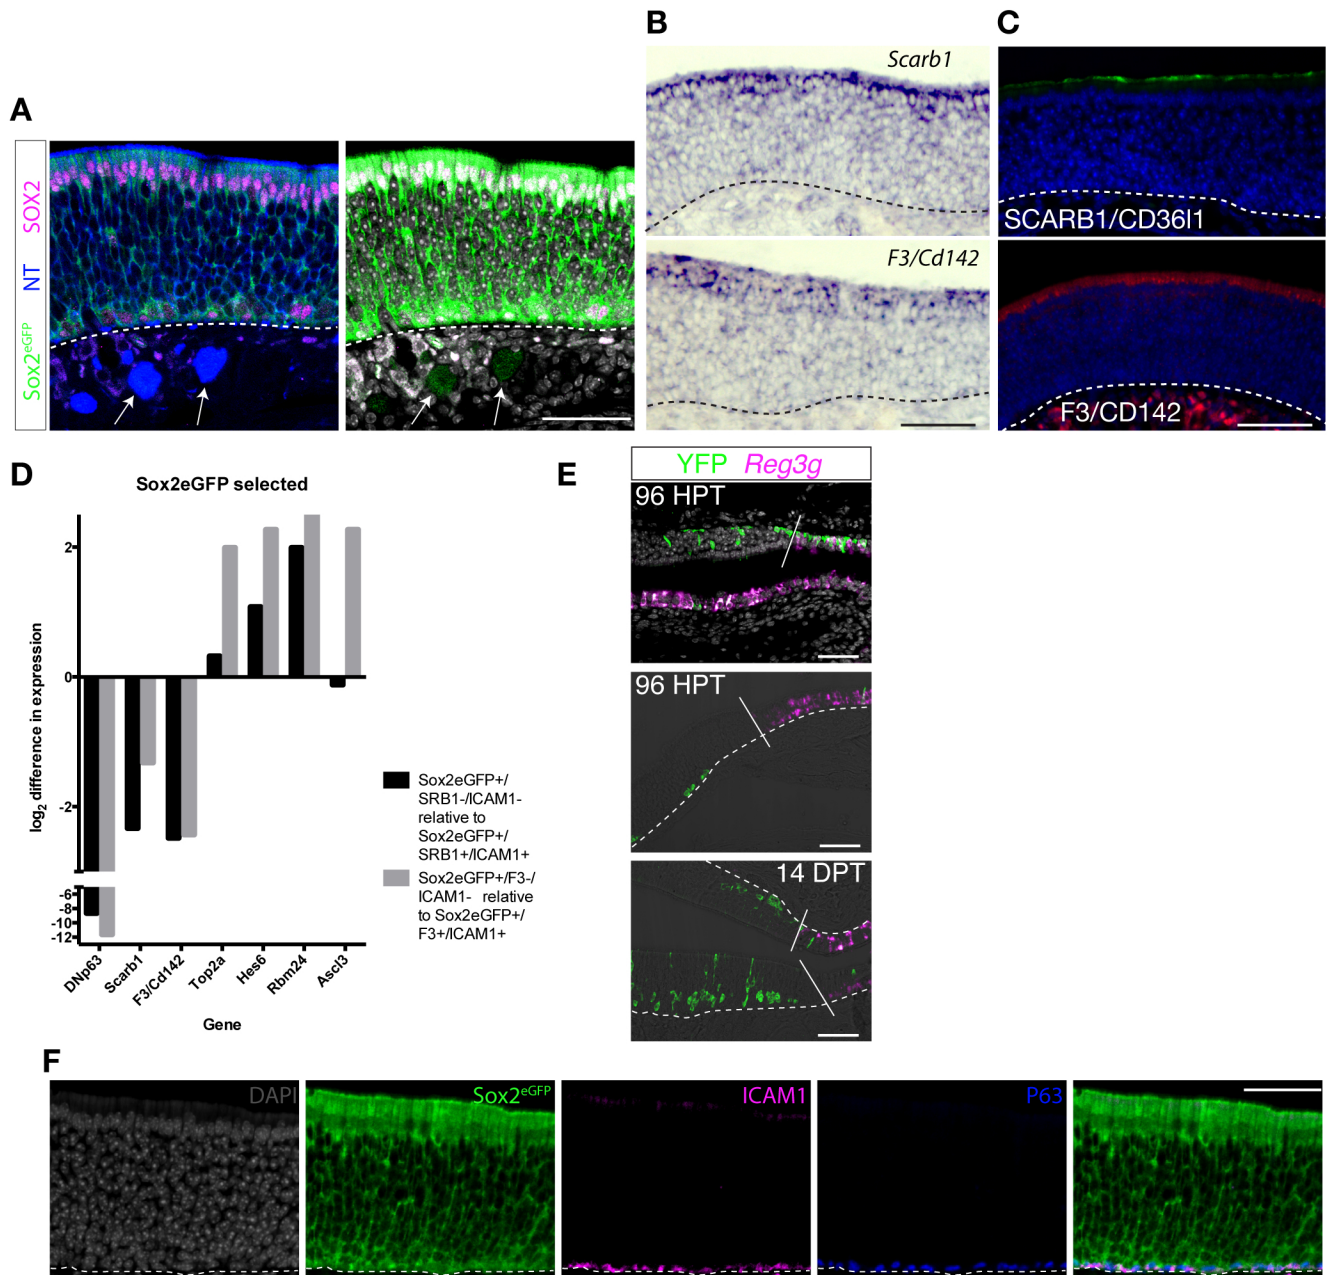

Figure S1

**Figure S1. Related to Figure 1**

**(A)** Sox2eGFP co-labels with neuronal tubulin (NT); overexposure reveals expression in the sub-mucosal axon fascicles (arrows). **(B,C)** Both *Scarb1* and *F3* RNA (B) and protein (C) localize to sustentacular cells. **(D)** RT-qPCR of FACS-purified Sox2-eGFP-positive cells demonstrates that cell depletion with SCARB1 or F3 antibodies enriches for neural progenitors (*Hes6*, *Rbm24*, and the cell cycle gene *Top2a*) and microvillous cells (*Asc13*) (n=1 for each; table with oligonucleotide sequences in Table S6). **(E)** *Reg3g* is expressed in the non-sensory regions of the epithelium, with no detectable expression in the *Krt5-CreER; Trp63<sup>lox/lox</sup>; Rosa26<sup>eYFP</sup>* lineage-traced tissue at any stage examined (96 hours post tamoxifen (HPT), 14 days post tamoxifen (DPT) or 48HPT (not shown)); solid lines mark the boundary between sensory and non-sensory epithelium. Dashed lines mark the boundary between the epithelium and submucosa; scale bar = 50 microns. **(F)** All HBCs express *p63*, *Icam1*, and *Sox2*: immunohistochemistry for the Sox2eGFP transgene, P63, and ICAM1 shows co-labeling. Scale bars, 50 microns.

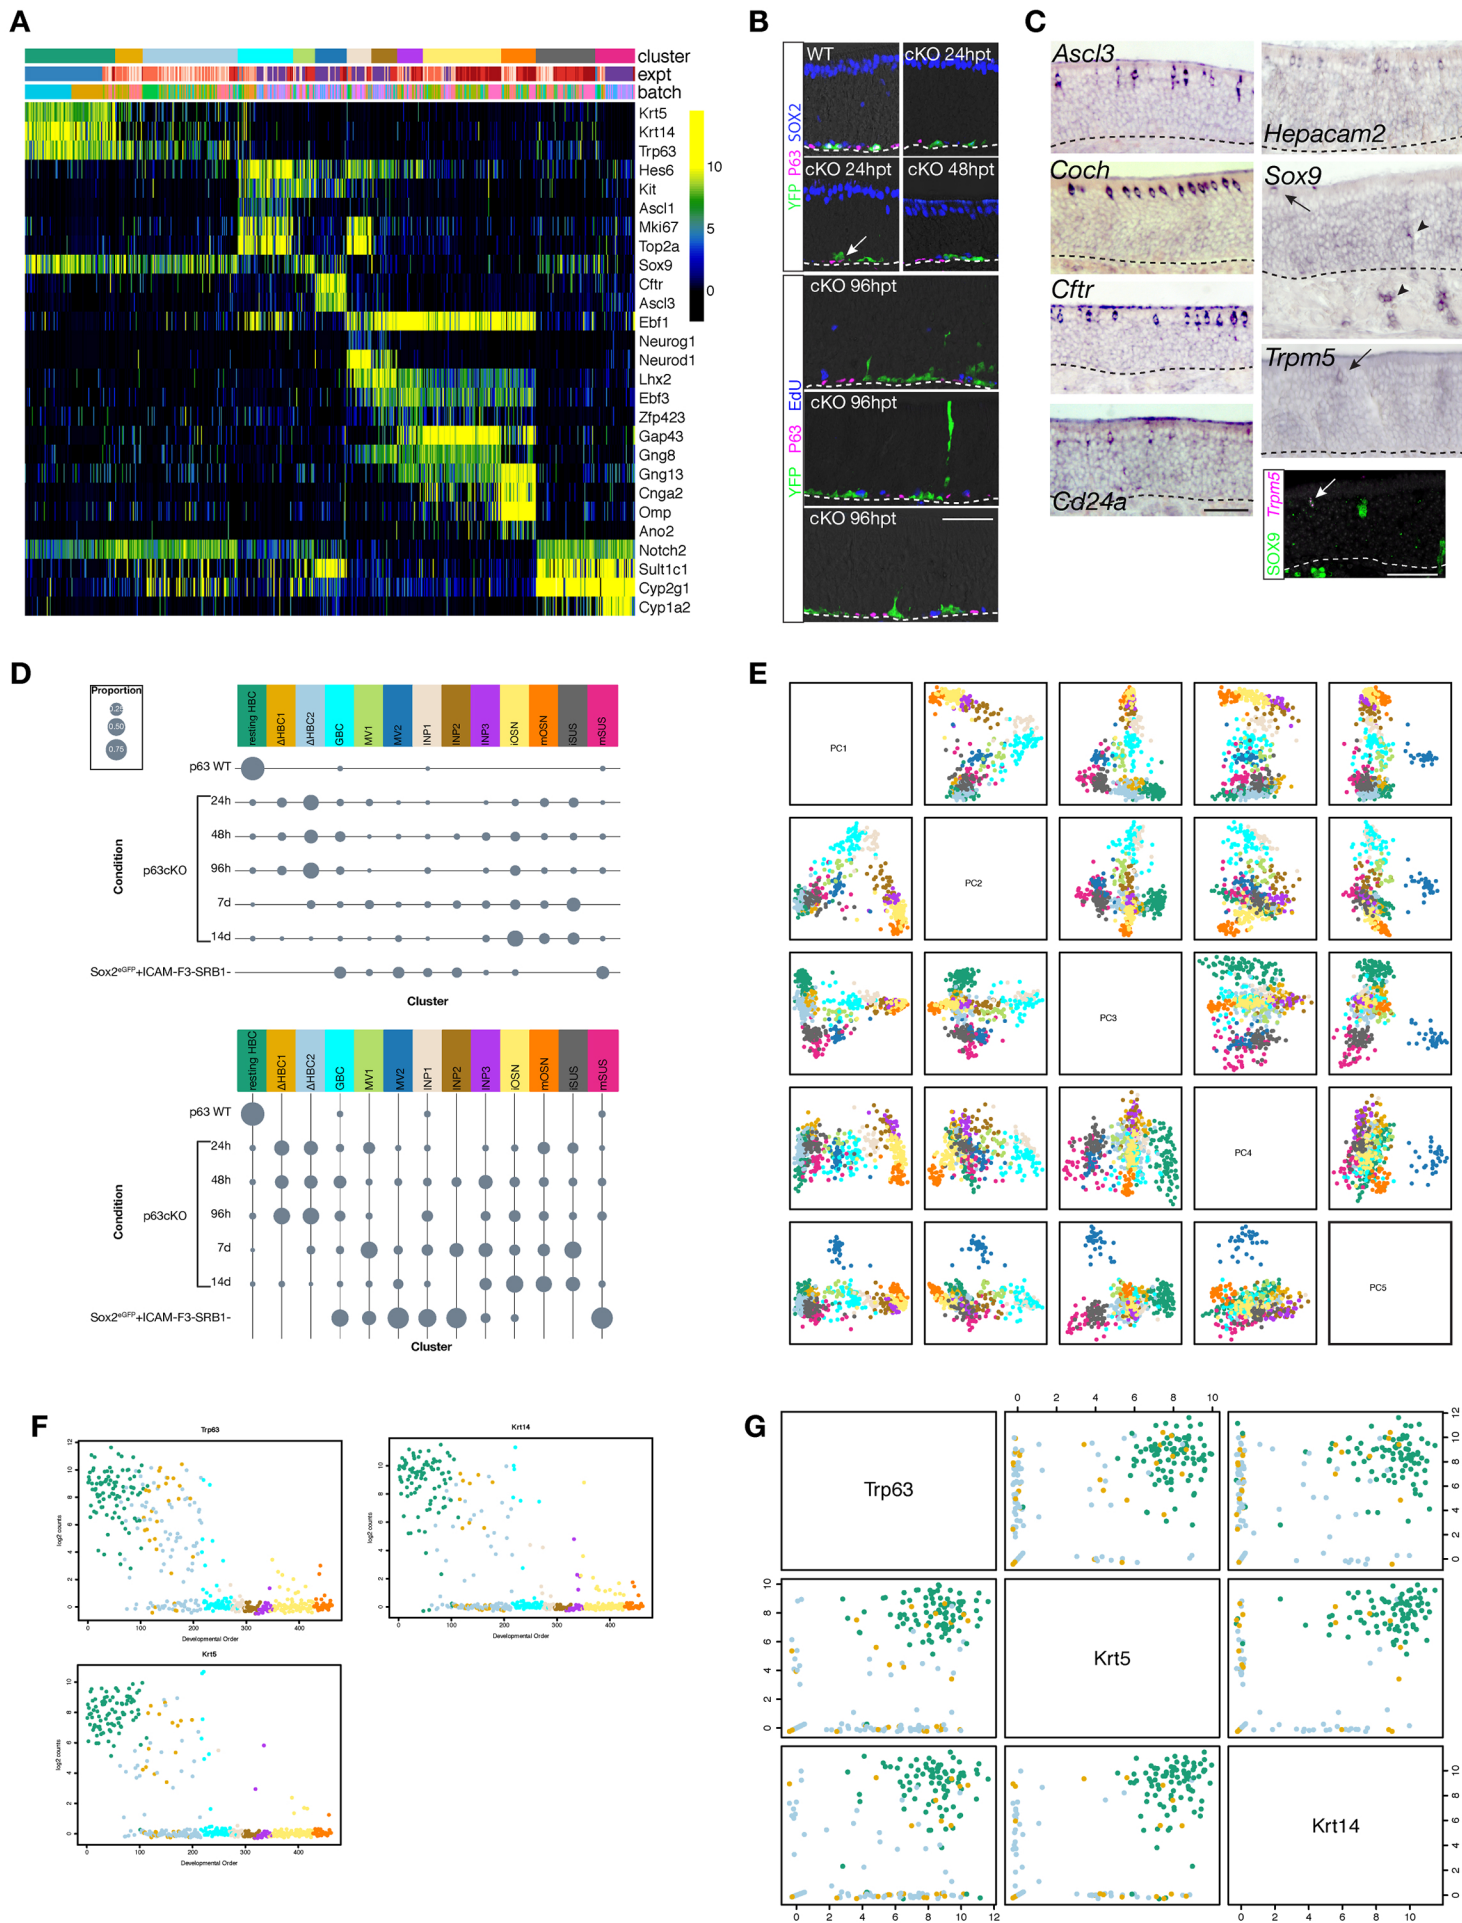

Figure S2

## Figure S2. Related to Figure 2

**(A)** The heatmap shows expression of selected marker genes (rows) in cells (columns) organized by cluster (indicated by colored coded bars across the top, as in Figure S1). Experimental condition and batch are indicated by the middle and bottom color bars. Experimental condition colors correspond to the time-points indicated in panel (D). **(B)** At 24 hours post tamoxifen (hpt), some HBCs still express *Trp63* (P63) while others no longer express detectable levels (arrow). By 48hpt, *Trp63* is no longer detectable by immunohistochemistry. There is asynchrony in the differentiation of HBCs upon conditional knockout (cKO) of *Trp63*, as the three examples demonstrate. **(C)** *Ascl3*, *Coch*, *Cftr*, *Cd24a*, *Hepacam2* label one type of microvillous cell. We also observe that *Sox9* is expressed in a different class of microvillous cells (arrow) in addition to the Bowman's gland (arrowheads). *Trpm5* is also expressed in this MV cell sub-type (arrow). **(D)** Differentiation is asynchronous, as evidenced by the partial overlap of experimental condition and cell cluster identity. In the top plot, the percentage of cells from each experimental condition that contribute to each cluster is indicated by the size of the circle. Note that most experimental conditions contribute to multiple clusters, while the *Trp63*<sup>+/+</sup> HBCs predominantly populate the resting HBC cluster. In the bottom plot, the size of the circles reflects the proportion of cells from each cluster derived from each experimental condition. These plots reveal that clusters defined by more differentiated cell types are populated by cells with later experimental time points. HBCs from *Trp63* wild type animals constitute most of the resting HBCs. *Sox2eGFP*-positive cells comprise mostly mature sustentacular cells and neuronal precursors. Persistence of GFP expression late in the neuronal lineage is due to perdurance of GFP following its initial expression in GBCs. **(E)** The first five principal components of the expression matrix of all detected genes effectively separate the clusters and serve as input for *Slingshot*. **(F)** Expression of *Trp63*, *Krt5*, and *Krt14*, established markers of resting HBCs (green), in the neuronal lineage and organized by developmental order. **(G)** Pairwise comparisons of *Trp63*, *Krt5*, and *Krt14* gene expression in the resting (green) and transitional HBCs ( $\Delta$ HBC1, gold;  $\Delta$ HBC2, light blue). All three are highly correlated in resting HBCs, but their expression is no longer tightly coordinated in the transition states.

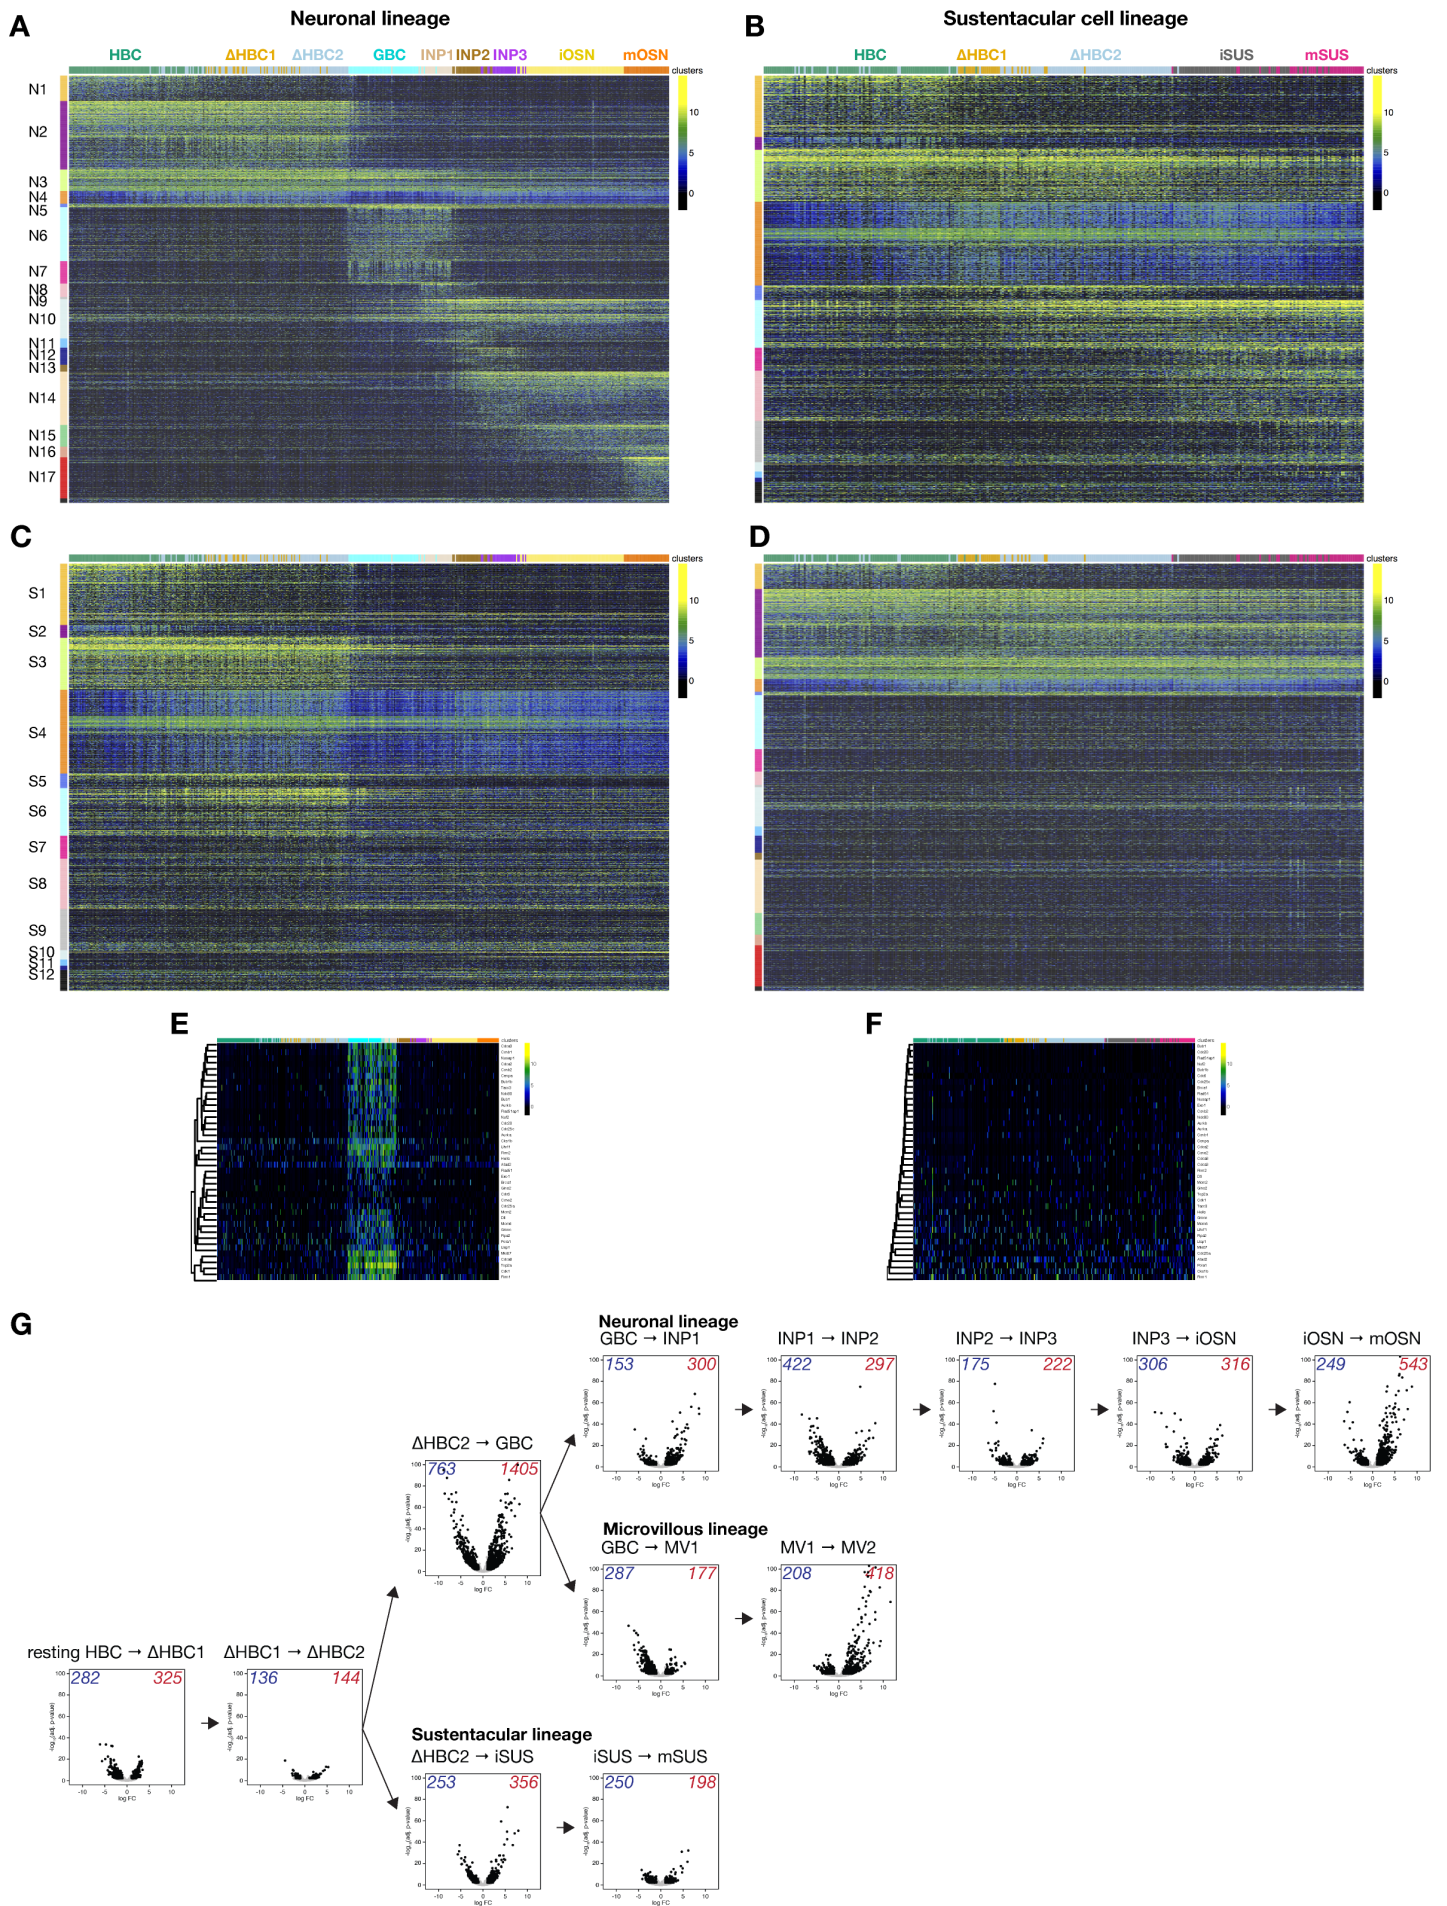

Figure S3

**Figure S3. Related to Figure 3**

**(A)** Expression (log<sub>2</sub> normalized counts) of all 2327 differentially expressed genes used in the gene clustering for the neuronal lineage, ordered by gene cluster (vertical axis) and neuronal lineage developmental order (horizontal axis). **(B)** Expression of all 1622 differentially expressed genes used in the gene clustering for the sustentacular cell lineage, ordered by gene cluster (vertical axis) and sustentacular cell lineage developmental order (horizontal axis). **(C)** Expression of the genes used in the sustentacular cell lineage gene clustering, as they are expressed in the neuronal lineage. **(D)** Expression of the genes used in the neuronal lineage gene clustering, as they are expressed in the sustentacular cell lineage. Note that the heatmap shows genes that are enriched in both resting and transitional HBCs as well as immature and mature sustentacular cells, highlighting the similarity of sustentacular cells and their HBC precursors. **(E, F)** Expression of the cell cycle genes used in the cell cycle gene set heatmap in Figure 3, in the neuronal (E) and sustentacular cell lineages (F). **(G)** Volcano plots of  $-\log_{10}$  adjusted p-value (adj. p-value) versus log<sub>2</sub> fold change (log<sub>2</sub>FC) between clusters. The plots are arranged to represent the lineage trajectory map and display the number of differentially expressed genes between the clusters at each transition in the lineage (genes with adj. p-value < 0.01 and log<sub>2</sub>FC > 1 are shown in black). Up-regulated genes are shown in red text and down-regulated in blue. *Limma* was used for differential expression, and the p-values were adjusted for multiplicity using the Benjamini-Hochberg procedure (see Star Methods). See Table S2.

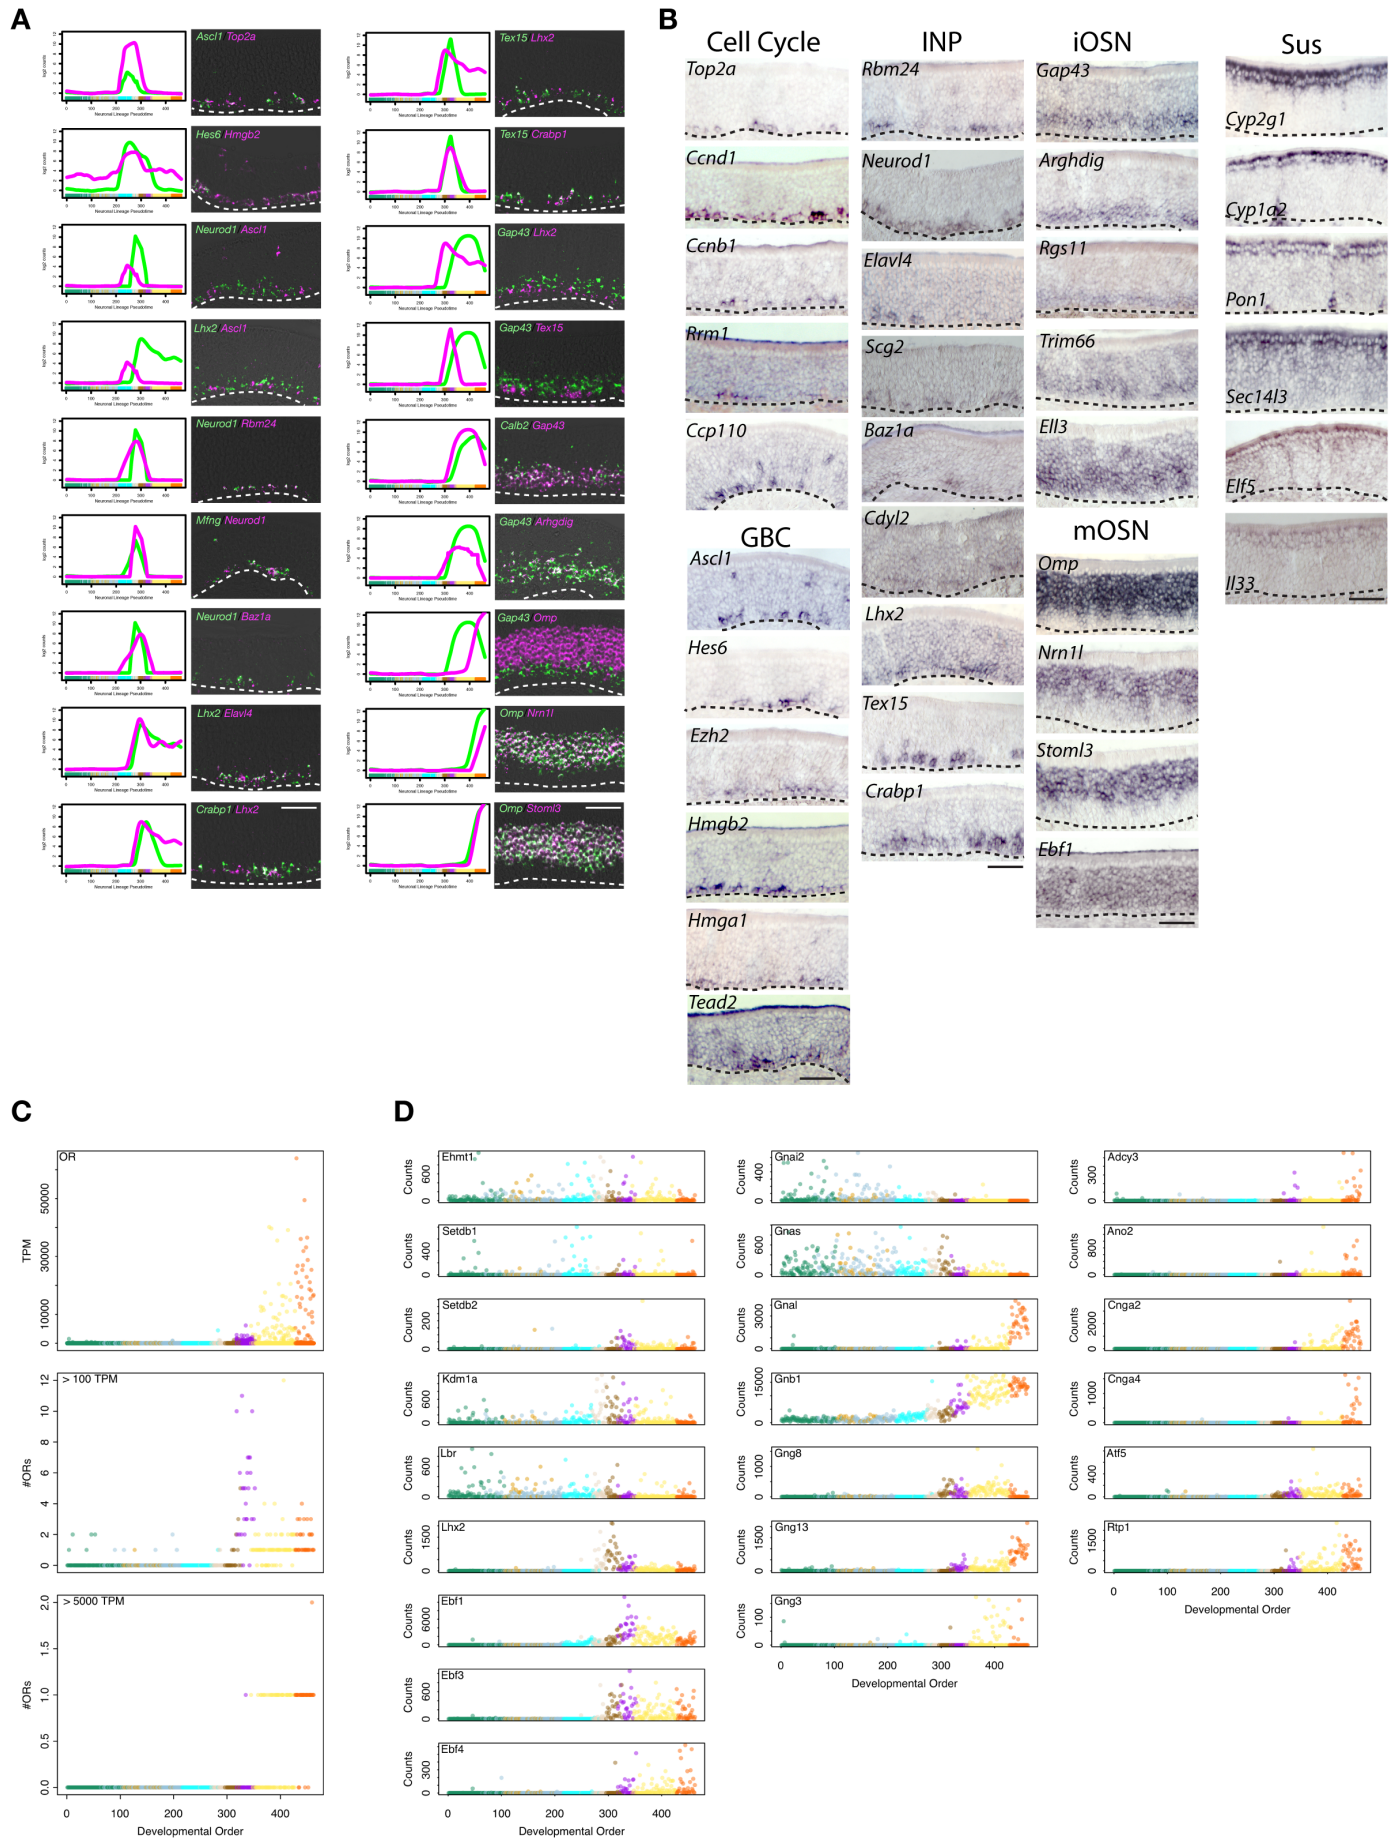

Figure S4

**Figure S4. Related to Figure 3**

**(A)** Double fluorescent RNA in situ hybridizations for the indicated genes in each panel. The plots are best-fit curves to the single-cell RNA-seq data from cells in the neuronal lineage, sorted by their developmental order in the lineage. Cells labeled with both probes appear white in these pseudo-colored images. The expression patterns of these selected genes demonstrate the progression of cells through multiple immediate neuronal precursor stages that were inferred by our single-cell RNA-seq analysis. **(B)** Colorimetric RNA in situ hybridizations for known and novel genes of the different olfactory cell types. We identified and validated many novel genes along the neuronal lineage (*Ezh2*, *Hmgb2*, *Hmga1*, *Tead2*, *Elavl4*, *Scg2*, *Baz1a*, *Cdyl2*, *Tex15*, *Crabp1*, *Arghdig*, *Ell3*, *Nrn1l*) and sustentacular cell lineage (*Pon1*, *Sec14l3*, *Elf5*, *Il133*). Scale bars = 50 microns. **(C)** Expression of odorant receptors (ORs) in the neuronal lineage, sorted by their developmental order in the lineage. The top panel reveals significant up-regulation of OR expression in mature olfactory sensory neurons (mOSN; orange). The second and third panels show the number of OR genes expressed per cell at different thresholds of expression. Multiple ORs are detected at the INP3 stage (purple); as cells mature, the pattern shifts to high level expression of one OR per cell, starting in the immature olfactory sensory neuron (iOSN) stage (yellow). **(D)** The remaining panels display selected transcription factors, chromatin modifiers and other signaling molecules relevant to OR gene expression.



**A**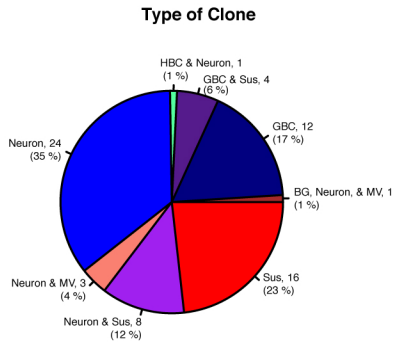**B**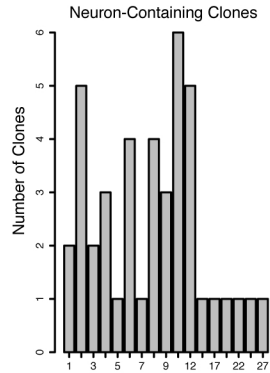**C**

**Sustentacular Cell-Containing Clones**

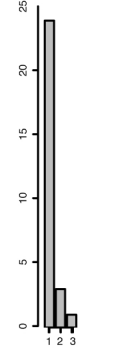**D**

**Microvillous Cell-Containing Clones**

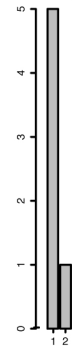

Cells per Clone

**E**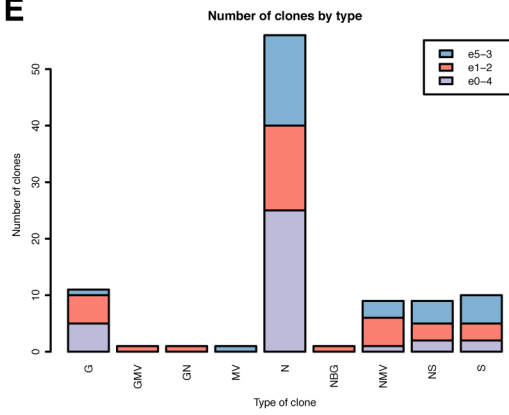**G**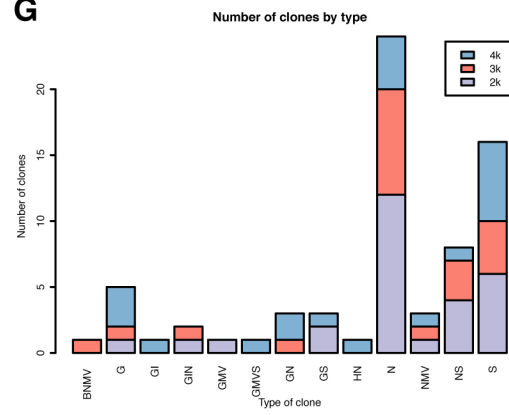**F**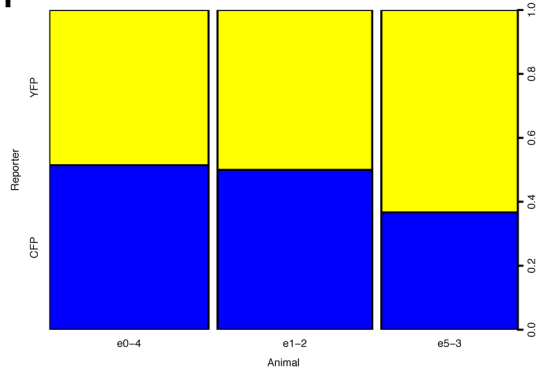**H**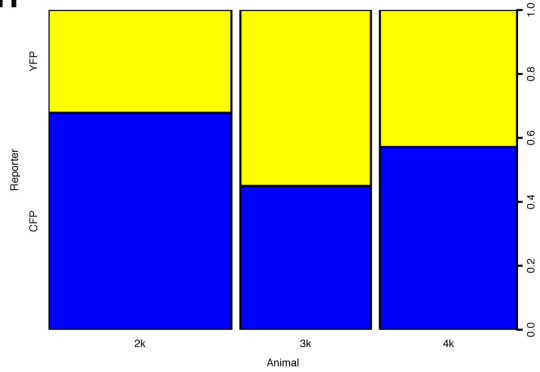**I**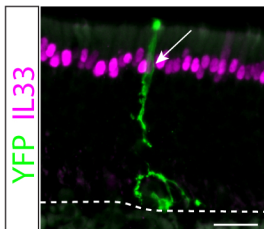**J**

| Sample | Distance | YFP+ | CASP3+ | Co-labeled |
|--------|----------|------|--------|------------|
| 24H-1  | 5475     | 187  | 20     | 0          |
| 24H-2  | 4816     | 118  | 25     | 0          |
| 24H-3  | 5037     | 158  | 23     | 1          |
| 48H-1  | 4421     | 158  | 11     | 0          |
| 48H-2  | 5550     | 258  | 28     | 1          |
| 96H-1  | 4245     | 273  | 25     | 0          |
| 96H-2  | 4669     | 249  | 10     | 0          |
| 7D-1   | 4327     | 245  | 17     | 0          |
| 7D-2   | 4990     | 278  | 27     | 1          |

**K**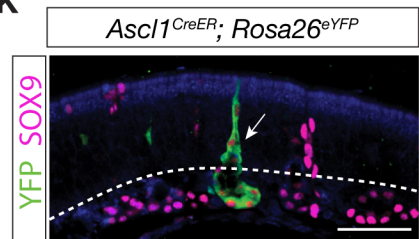

**Figure S5**

## Figure S5. Related to Figure 4

**(A-D)** *Krt5-CreER; Trp63<sup>lox/lox</sup>; Rosa26<sup>Confetti</sup>* clonal lineage tracing analysis at 7-days post tamoxifen (DPT) induction. A summary of the types of clones obtained is presented in (A). Neuron-containing clones usually contain more than one neuron (mean = 8.8 +/- 1.0 standard error of the mean), whereas sustentacular cells (C) and microvillous cells (D) are almost always limited to one cell of that type per clone (1.2 +/- 0.1 and 1.2 +/- 0.2, respectively). Note that the GBC category in (A) represents all GBC-containing clones that had any type of cell from the neuronal lineage, such as a neuron or microvillous cell. **(E-H)** Plots relating to the 14DPT (E, F) or 7DPT (G, H) clonal lineage tracing. (E, G) The number of clones of each type from each animal in the analysis. **(F, H)** The proportion of clones that were labeled by membrane CFP or cytosolic YFP for each animal. These data demonstrate the consistency of our observations across multiple animals; no single animal skewed the results. G = GBC; GMV = GBC, microvillous cell; GN = GBC, neuron; MV = microvillous cell; N = neuron; NBG = neuron, Bowman's gland; NMV = neuron, microvillous cell; NS = neuron, sustentacular cell; S = sustentacular cell; BNMV = Bowman's gland, neuron, microvillous cell; GI = GBC, neural precursor; GIN = GBC, neural precursor, neuron; GMVS = GBC, microvillous cell, sustentacular cell; GS = GBC, sustentacular cell; HN = HBC, neuron. **(I)** Immunohistochemistry for YFP and IL33 in a *Krt5-CreER; Trp63<sup>lox/lox</sup>; Rosa26<sup>Confetti</sup>* clone demonstrates co-labeling of a sustentacular cell with nuclear IL33 (arrow), consistent with our classification. Scale bar, 25 microns. **(J)** Table of the quantification of the immunohistochemistry of the *Krt5-CreER; Trp63<sup>lox/lox</sup>; Rosa26<sup>eYFP</sup>* samples presented in the main Figure 4. The table displays the animals/samples at each time-point (24-hours, 48-hours, 96-hours, and 7-days) post tamoxifen injection, the length of OE counted in microns, the number of YFP+ lineage traced cells, the number of activated CASPASE3+ cells, and the number of co-labeled cells in each sample **(K)** This micrograph shows a rare Bowman's gland labeled by *Ascl1-CreER; Rosa26<sup>eYFP</sup>* lineage tracing at 21 DPT. Scale bar, 50 microns.

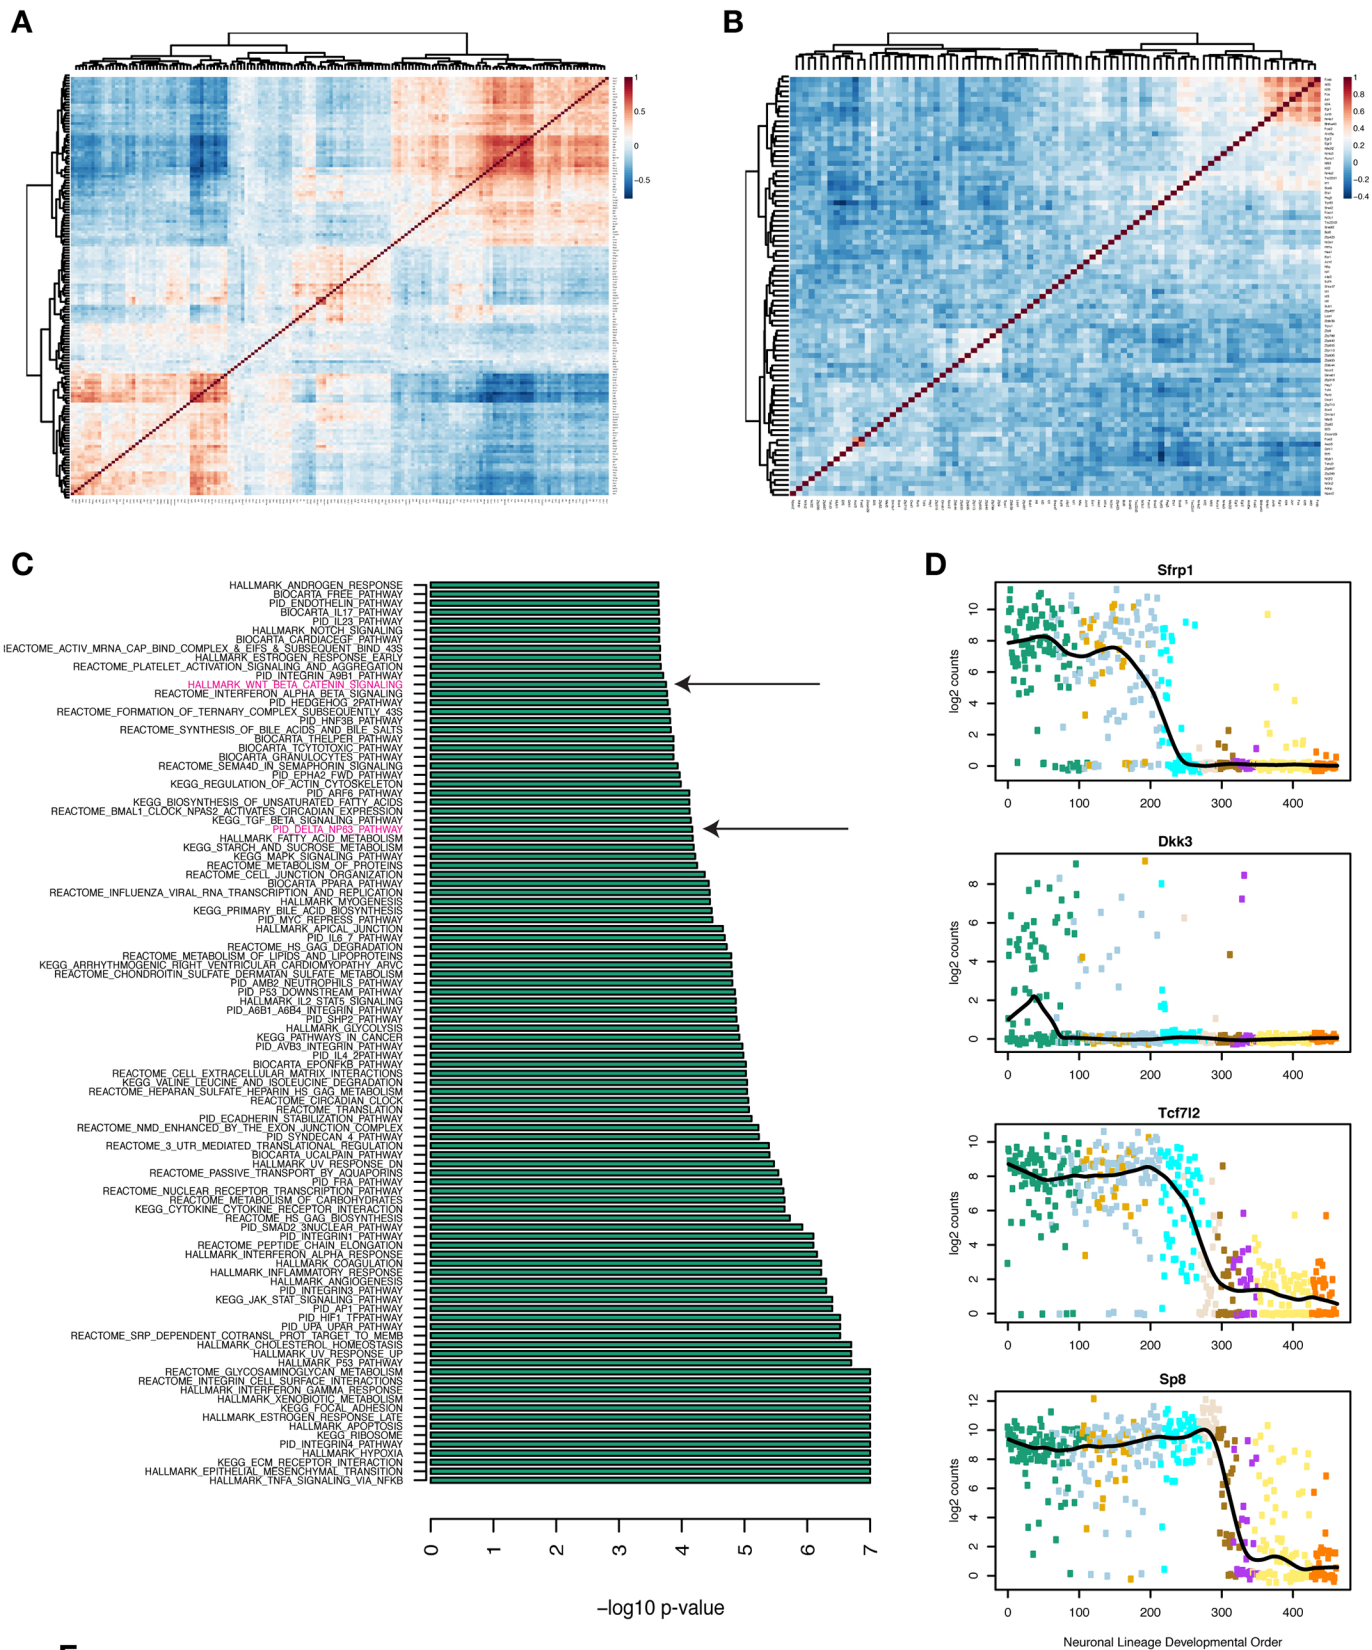

Figure S6

**Figure S6. Related to Figure 5**

**(A, B)** Correlation heatmap of the most highly differentially expressed (DE) transcription factors of the neuronal (A) and sustentacular cell (B) lineages. **(C)** Gene Set Enrichment Analysis (GSEA) for the resting HBC cluster, sorted by the  $-\log_{10}$  p-value; the top 100 gene sets are displayed. The Wnt signaling pathway and the P63 (Trp63) pathway are highlighted in magenta. See also Table S4. **(D)** Gene expression plots for the secreted Wnt signaling antagonists (*Sfrp1*, *Dkk3*) and key transcription factors involved in Wnt signaling (*Tcf7l2*, *Sp8*). **(E)** Consistent with our contention that HBCs form more sustentacular support cells relative to neurons in the *p63<sup>lox/lox</sup>; Beta-catenin<sup>lox/lox</sup>* double knockout, many of the HBC derived cells in the middle and apical regions of the epithelium express IL33, a gene we validated as being expressed in sustentacular cells and Bowman's gland, and not neurons (see Figure S4).
